# Supplementary material
Source: PubMed Central journal article supplement (PMC5903439)
Supplement: NIHMS812676-supplement-1.pdf [file NIHMS812676-supplement-1.pdf]

**Suppl. Table 1. Fluorochrome-conjugated antibodies used for flow cytometric analysis**

| <b>Antibody</b> | <b>Clone</b> | <b>Fluorochrome</b>  | <b>Manufacturer</b> |
|-----------------|--------------|----------------------|---------------------|
| CD11b           | M1/70        | PE-Cy5               | BioLegend           |
| CD11b           | M1/70        | eFluor 450           | eBioscience         |
| CD11c           | N418         | PE-Cy7               | eBioscience         |
| CD11c           | HL3          | PE-Cy7               | BD Pharmingen       |
| CD24            | M1/69        | APC                  | BioLegend           |
| CD45.2          | 104          | Brilliant Violet 650 | BioLegend           |
| CD64            | X54-5/7.1    | PE                   | BioLegend           |
| CD107b (Mac3)   | ebioABL-93   | PE                   | eBioscience         |
| IFN $\gamma$    | XMG1.2       | Brilliant Violet 650 | BioLegend           |
| Ly6C            | al-21        | PerCP-Cy5.5          | BD Pharmingen       |
| Ly6G            | 1A8          | Alexa Fluor 700      | BioLegend           |
| MHCII           | M5/114.15.2  | V500                 | BD Horizon          |
| Siglec-F        | E50-2400     | PE-CF594             | BD Horizon          |
| TNF $\alpha$    | MP6-XT22     | Alexa Fluor 700      | BioLegend           |
| Rat IgG2b       | RTK4530      | PE-Cy5               | BioLegend           |
| Rat IgG2b       | eB149/10H5   | eFluor 450           | eBioscience         |
| Ar Ham IgG      | HTK888       | PE-Cy7               | BioLegend           |
| Rat IgG2b       | RTK4530      | APC                  | BioLegend           |
| Mouse IgG1      | MOPC-21      | PE                   | BioLegend           |
| Rat IgG2a       | R35-95       | PE                   | BD Biosciences      |
| Mouse IgG2a     | MOPC-173     | Brilliant Violet 650 | BioLegend           |
| Rat IgG1        | RTK2071      | Brilliant Violet 650 | BioLegend           |
| Rat IgM         | R4-22        | PerCP-Cy5.5          | BD Pharmingen       |
| Rat IgG2a       | R35-95       | Alexa Fluor 700      | BD Biosciences      |
| Rat IgG2b       | A95-1        | V500                 | BD Biosciences      |
| Rat IgG2a       | R35-95       | PE-CF594             | BD Biosciences      |
| Rat IgG1        | RTK2071      | Alexa Fluor 700      | BioLegend           |
