# Supplementary material
Source: PubMed Central journal article supplement (PMC5903439)
Supplement: NIHMS812676-supplement-2.pdf [file NIHMS812676-supplement-2.pdf]

## Matrix Protein 2

10 20 30 40 50 60 70 80 90  
*A/PR/08/1934* M S L L T E V E T P I R N E W G C R C N G S S D P L A I A A N I G I L H L I L W I L D R L F F K C I Y R R F K Y G L K G P S T E G V P K S M R E E Y R K E Q Q S A V D A D D G H  
*A/CA/04/2009* M S L L T E V E T P T R S E W E C R C S D S S D P L V I A A N I G I L H L I L W I T D R L F F K C I Y R R F K Y G L K R G P S T E G V P F E S M R E E Y Q Q E Q Q S A V D V D D G H

*A/PR/08/1934* F V S I E L E  
*A/CA/04/2009* F V N I E L E

## Non-Structural Protein 1

10 20 30 40 50 60 70 80 90  
*A/PR/08/1934* M D P N T V S S F Q V D C F L W H V R K R V A D Q E L G D A P F L D R L R R D Q K S L R G R G S T L G L D I E T A T R A G K Q I V E R I L K E E S D E A L K M T M A S V P A S R Y L  
*A/CA/04/2009* M D S N T M S S F Q V D C F L W H I R K R F A D N G L G D A P F L D R L R R D Q K S L K G R G N T L G L D I E T A T L V G K Q I V E W I L K E E S S E T L R M T I A S V P T S R Y L

100 110 120 130 140 150 160 170 180  
*A/PR/08/1934* T D M T L E E M S R E W S M L I P K Q K V A G P L C I R M D Q A I M D K N I I L K A N F S V I F D R L E T L I L L R A F T E E G A I V G E I S P L P S L P G H T A E D V K N A V G V  
*A/CA/04/2009* S D M T L E E M S R D W F M L M P R Q K I I G P L Q V R L D Q A I M E K N I V L K A N F S V I F N R L E T L I L L R A F T E E G A I V G E I S P L P S L P G H T Y E D V K N A V G V

190 200 210 220 230  
*A/PR/08/1934* L I G G L E W N D N T V R V S E T L Q R F A W R S S N E N G R P P L T F K Q K R E M A G T I R S E V  
*A/CA/04/2009* L I G G L E W N G N T V R V S E N I Q R F A W R N C D E N G R R S L P F E Q K - - - - -

## Non-Structural Protein 2

10 20 30 40 50 60 70 80 90  
*A/PR/08/1934* M D P N T V S S F Q D I L L R M S K M Q L E S S S E D L N G M I T Q F E S L K I Y R D S L G E A V M R M G D L H S L Q N R N E K W R E Q L G Q K F E E I R W L I E E V R H K L K V T  
*A/CA/04/2009* M D S N T M S S F Q D I L M R M S K M Q L G S S S E D L N G M V T R F E S L K I Y R D S L G E T V M R M G D L H Y L Q S R N E K W R E Q L G Q K F E E I R W L I E E M R H R L K A T

100 110 120  
*A/PR/08/1934* E N S F E Q I T F M Q A L H L L L E V E Q E I R T F S F Q L I  
*A/CA/04/2009* E N S F E Q I T F M Q A L Q L L L E V E Q E I R A F S F Q L I

## Polymerase Protein PA

10 20 30 40 50 60 70 80 90  
*A/PR/08/1934* M E D F V R Q C F N P M I V E L A E K T M K E Y G E D L K I E T N K F A A I C T H L E V C F M Y S D F H F N E Q G E S I I V E L G D P N A L L K H R F E I E G R D R T M A W T V  
*A/CA/04/2009* M E D F V R Q C F N P M I V E L A E K A M K E Y G E D P K I E T N K F A A I C T H L E V C F M Y S D F H F D E R G E S I I V E S G D P N A L L K H R F E I E G R D R I M A W T V

100 110 120 130 140 150 160 170 180  
*A/PR/08/1934* V N S I C N T T G A E K P K F L P D L Y D Y K E N R F I E I G V T R R E V H I Y Y L E K A N K I K S E K T H I H I F S F T G E E M A T K A D Y T L D E E S R A R I K T R L F T I R Q  
*A/CA/04/2009* V N S I C N T T G V E K P K F L P D L Y D Y K E N R F I E I G V T R R E V H I Y Y L E K A N K I K S E K T H I H I F S F T G E E M A T K A D Y T L D E E S R A R I K T R L F T I R Q

190 200 210 220 230 240 250 260 270  
*A/PR/08/1934* E M A S R G L W D S F R Q S E R G E E T I E E R F E I T G T M R K L A D Q S L P P N F S S L E N F R A Y V D G F E P N G Y I E G K L S Q M S K E V N A R I E P F L K T T P R P L R L  
*A/CA/04/2009* E M A S R S L W D S F R Q S E R G E E T I E E K F E I T G T M R K L A D Q S L P P N F P S L E N F R A Y V D G F E P N G C I E G K L S Q M S K E V N A K I E P F L R T T P R P L R L

280 290 300 310 320 330 340 350 360  
*A/PR/08/1934* P N G P P C S Q R S K F L L M D A L K L S I E D P S H E G E G I P L Y D A I K C M R T F F G W K E P N V V K P H E K G I N P N Y L S W K Q V L A E L Q D I E N E E K I P K T K N M  
*A/CA/04/2009* P D G R L C H Q R S K F L L M D A L K L S I E D P S H E G E G I P L Y D A I K C M K T F F G W K E P N I V K P H E K G I N P N Y L M A W K Q V L A E L Q D I E N E E K I P R T K N M

370 380 390 400 410 420 430 440 450  
*A/PR/08/1934* K K T S Q L K W A L G E N M A P E K V D F D D C K D V G D L K Q Y D S D E P E L R S L A S W I Q N E F N K A C E L T D S S W I E L D E I G E D V A P I E H I A S M R R N Y F T S E V  
*A/CA/04/2009* K R T S Q L K W A L G E N M A P E K V D F D D C K D V G D L K Q Y D S D E P E P R S L A S W V Q N E F N K A C E L T D S S W I E L D E I G E D V A P I E H I A S M R R N Y F T A E V

460 470 480 490 500 510 520 530 540  
*A/PR/08/1934* S H C R A T E Y I M K G V Y I N T A L L N A S C A A M D D F L I P M I S K R C T K E G R R K T N L Y G F I I K G R S H L R N D T D V V N F V S M E F S L T D P R L E P H K W E K Y  
*A/CA/04/2009* S H C R A T E Y I M K G V Y I N T A L L N A S C A A M D D F L I P M I S K R C T K E G R R K T N L Y G F I I K G R S H L R N D T D V V N F V S M E F S L T D P R L E P H K W E K Y

550 560 570 580 590 600 610 620 630  
*A/PR/08/1934* C V L E I G D M L L R S A I G Q V S R P M F L Y V R T N G T S K I K M K W G M E M R R C L L Q S L Q Q I E S M I E A E S S V K E K D M T K E F F E N K S E T W P I G E S P K G V E E  
*A/CA/04/2009* C V L E I G D M L L R T A I G Q V S R P M F L Y V R T N G T S K I K M K W G M E M R R C L L Q S L Q Q I E S M I E A E S S V K E K D M T K E F F E N K S E T W P I G E S P R G V E E

640 650 660 670 680 690 700 710  
*A/PR/08/1934* S S I G K V C R T L L A K S V F N S L Y A S P Q L E G F S A E S R K L L I V Q A L R D N L E P G T F D L G G L Y E A I E E C L I N D P W V L L N A S W F N S F L T H A L S  
*A/CA/04/2009* G S I G K V C R T L L A K S V F N S L Y A S P Q L E G F S A E S R K L L I V Q A L R D N L E P G T F D L G G L Y E A I E E C L I N D P W V L L N A S W F N S F L T H A L K

# Polymerase Protein PB1

10 20 30 40 50 60 70 80 90  
*AFPR08/1934* MDVNP TLLFLKVP AQNAISTTFFPYTGDPYPYSHGTGTGYTMDTVNRTHQYSEKARWTTNTTETGAPQLNPIDGGLPEDNEPSSGYAQTDCVLE  
*ACA04/2009* MDVNP TLLFLKVP AQNAISTTFFPYTGDPYPYSHGTGTGYTMDTVNRTHQYSEKARWTTNTTETGAPQLNPIDGGLPEDNEPSSGYAQTDCVLE

100 110 120 130 140 150 160 170 180  
*AFPR08/1934* AMAFLEESHPIGFENSCLEETMEVQQTRVDKLTQGRQTYDWTLNRNQPAATALANTIEVFRSNGLTANESGRLIDFLKDVMEISMKKEEMG  
*ACA04/2009* AMAFLEESHPIGFENSCLEETMEVQQTRVDKLTQGRQTYDWTLNRNQPAATALANTIEVFRSNGLTANESGRLIDFLKDVMEISMNKEELE

190 200 210 220 230 240 250 260 270  
*AFPR08/1934* ITTHFQRKRRVRDNMTKKMVTQRTIGKRRKQRLNKRSYLIRALTLNMTKDAERGKLRRAIATPGMQIRGFVYFVETLARSICEKLEQSG  
*ACA04/2009* ITTHFQRKRRVRDNMTKKMVTQRTIGKRRKQRLNKRGYLIRALTLNMTKDAERGKLRRAIATPGMQIRGFVYFVETLARSICEKLEQSG

280 290 300 310 320 330 340 350 360  
*AFPR08/1934* LPVGGNEKKAKLANVVRKMMTNSQDTELSLTI TGDNTKWNENQNPRLMFLAMITYMTRNQPEWFRNVLSTAPIMFSNKMARLGKGYMFESK  
*ACA04/2009* LPVGGNEKKAKLANVVRKMMTNSQDTELSLFTITGDNTKWNENQNPRLMFLAMITYMTRNQPEWFRNVLSTAPIMFSNKMARLGKGYMFESK

370 380 390 400 410 420 430 440 450  
*AFPR08/1934* SMKLRITQIPAEMLASIDLKYFNDESTKKEIEKIRPLLIDGTASLSPGMMMGFMNMLSTVLGVSILNLGQKRYTKTIYWWDGLQSSDDFALI  
*ACA04/2009* RMKLRITQIPAEMLASIDLKYFNDESTKKEIEKIRPLLIDGTASLSPGMMMGFMNMLSTVLGVSILNLGQKRYTKTIYWWDGLQSSDDFALI

460 470 480 490 500 510 520 530 540  
*AFPR08/1934* VNAPNHEG IQAGVDRFYRTCKLHGINMSKKKSYINRGTGTFEFTSFFYRYGFVANFSMELPSFGVSGSNESADMSIGVTVIKNNMINNDLG  
*ACA04/2009* VNAPNHEG IQAGVDRFYRTCKLVGINMSKKKSYINKGTGTFEFTSFFYRYGFVANFSMELPSFGVSGVNESADMSIGVTVIKNNMINNDLG

550 560 570 580 590 600 610 620 630  
*AFPR08/1934* PATAQMALQLFIKDYRYTYRCHRGDTQIQTRRSFEIKKLWEDTRSKAGLLVSDGGPNLYNIRNLHIEVCLKWEMLMDEYDQGRRLCNPLNP  
*ACA04/2009* PATAQMALQLFIKDYRYTYRCHRGDTQIQTRRSFEIKKLWEDTQSKVGLLVSDGGPNLYNIRNLHIEVCLKWEMLMDDYRGRRLCNPLNP

640 650 660 670 680 690 700 710 720  
*AFPR08/1934* FVSHKEI ESMNNAVMMPAHGPAKNMEYDAVATTHSWIPKRNRSILNTSQRQVLEDEQMYQRCCNLFKFKFPSSSYRRPVGISSMVEAMVS  
*ACA04/2009* FVSHKEIDSMNNAVMMPAHGPAKSMYDAVATTHSWIPKRNRSILNTSQRQVLEDEQMYQRCCNLFKFKFPSSSYRRPVGISSMVEAMVS

730 740 750  
*AFPR08/1934* RARIDARIDFESGRIKKEEFTEIMKICSTIEELRRQK  
*ACA04/2009* RARIDARVDFESGRIKKEEFSEIMKICSTIEELRRQK

# Polymerase Protein PB2

10 20 30 40 50 60 70 80 90  
*AFPR08/1934* MERIKELRNLMSSQSRTRILTCTVDHMAI IKKYTSGRQEKNPALRMKWMAMKYPITADKRIEMIPERNEQQGTLWSKMNDAGSDRVM  
*ACA04/2009* MERIKELRDLMSQSRTRILTCTVDHMAI IKKYTSGRQEKNPALRMKWMAMRYPITADKRIEMIPERNEQQGTLWSKNTDAGSDRVM

100 110 120 130 140 150 160 170 180  
*AFPR08/1934* VSPLAVTWNRRNGPMTNTVHYPKIYKTYFERVERLKHGTFGPVHFRNQVKIRRRVDINPGHADLSAKEAQDVIMEVFPNEVGARILTSE  
*ACA04/2009* VSPLAVTWNRRNGPTTSTVHYPKVYKTYFEKVERLKHGTFGPVHFRNQVKIRRRVDINPGHADLSAKEAQDVIMEVFPNEVGARILTSE

190 200 210 220 230 240 250 260 270  
*AFPR08/1934* SQLTITKEKKEELQDCKISPLMVAYMLERELVRKTRFLPVAGGTSVYIEVLHLTQGTQWQMYTPGGEVKNDVDQSLIAARNIVRRA  
*ACA04/2009* SQLAITKEKKEELQDCKIAPLMVAYMLERELVRKTRFLPVAGGTGSVYIEVLHLTQGTQWQMYTPGGEVKNDVDQSLIAARNIVRRA

280 290 300 310 320 330 340 350 360  
*AFPR08/1934* AVSADPLASLLEMCHSTQIGGIRMVDI LKQNPTEEQAVGICKAAMGLRISSSSFGGFTFKRTSGSSVKKEEEVLTGNLQTLKIRVHEGY  
*ACA04/2009* AVSADPLASLLEMCHSTQIGGIRMVDI LRQNPTEEQAVDICKAAIGLRISSSSFGGFTFKRTSGSSVKKEEEVLTGNLQTLKIRVHEGY

370 380 390 400 410 420 430 440 450  
*AFPR08/1934* EEF TMVGRRA TAILRKATRRLIQLIVSGRDEQSIAEAIIVAMVFSQEDCMIKAVRGDLNFVNRRANQRLNPMHQLLRHFQKDAKVLFNQWVG  
*ACA04/2009* EEF TMVGRRA TAILRKATRRLIQLIVSGRDEQSIAEAIIVAMVFSQEDCMIKAVRGDLNFVNRRANQRLNPMHQLLRHFQKDAKVLFNQWVG

460 470 480 490 500 510 520 530 540  
*AFPR08/1934* VEPIDNVNMGMI GILPDMTPSI EMSMRGVRI SKMGVDEYSSTERVVVSDRFLVRVDRQGNVLLSPEEVSETQGTTEKLTITYSSMMWEIN  
*ACA04/2009* IESIDNVNMGMI GILPDMTPSI EMSLRGIRVSKMGVDEYSSTERVVVSDRFLVRVDRQGNVLLSPEEVSETQGTTEKLTITYSSMMWEIN

550 560 570 580 590 600 610 620 630  
*AFPR08/1934* GPESVLVNTYQWIRNWEITVKIQWSQNP TMLYNKMEFEPFQSLVPKAI RGGYSGFVRTLFQQMRDVLGTFDTAQIKLLPFAAAPPKQSR  
*ACA04/2009* GPESVLVNTYQWIRNWEITVKIQWSQNP TMLYNKMEFEPFQSLVPKAI TRSRYSGFVRTLFQQMRDVLGTFDTVQIKLLPFAAAPPEQSR

640 650 660 670 680 690 700 710 720  
*AFPR08/1934* MQFSSFTVNVVRSQMRILVVRGNSPVFNYNKATKRLTVLGKDAQTLTEDPDEGTASVESAVLRGFLILGKEDRRYGPALSINELSNLAKGE  
*ACA04/2009* MQFSSLTVNVVRSGLRILVVRGNSPVFNYNKATKRLTVLGKDAQALTLEDPDEGTSVESAVLRGFLILGKEDKRYGPALSINELSNLAKGE

730 740 750  
*AFPR08/1934* KANVLI GGGDVVLMKRRDSSILTDSQTATKRIRMAIN  
*ACA04/2009* KANVLI GGGDVVLMKRRDSSILTDSQTATKRIRMAIN

# Nucleoprotein

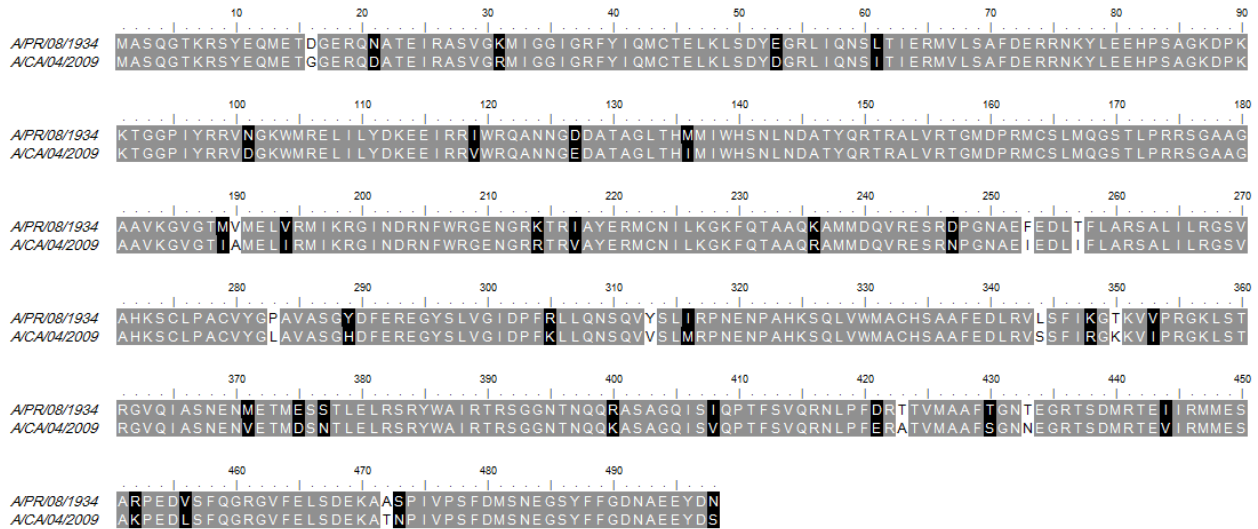

| Viral Proteins           | Percent Homology |
|--------------------------|------------------|
| Hemagglutinin            | 81.42            |
| Neuraminidase            | 83.48            |
| Matrix protein 1         | 94.84            |
| Matrix protein 2         | 86.6             |
| Non-structural protein 1 | 82.65            |
| Non-structural protein 2 | 87.6             |
| Polymerase protein PA    | 95.95            |
| Polymerase protein PB1   | 94.85            |
| Polymerase protein PB2   | 95.13            |
| Nucleoprotein            | 91.57            |

**Supplemental Figure 1.** Protein sequences for different viral proteins were retrieved from NCBI for A/California/04/2009 and A/Puerto Rico/8/1934 H1N1 virus isolates. The sequence alignment was performed by ClustalW using default parameters and edited using BioEdit. Identical and similar amino acid residues are represented in gray and black background respectively. The percent identity was calculated using Clustal Omega. Matrix used for alignment by ClustalW: BLOSUM62
