# Supplementary material
Source: PubMed Central journal article supplement (PMC5903439)
Supplement: NIHMS812676-supplement-4.pdf [file NIHMS812676-supplement-4.pdf]

# PR8: Lung Cell Analysis

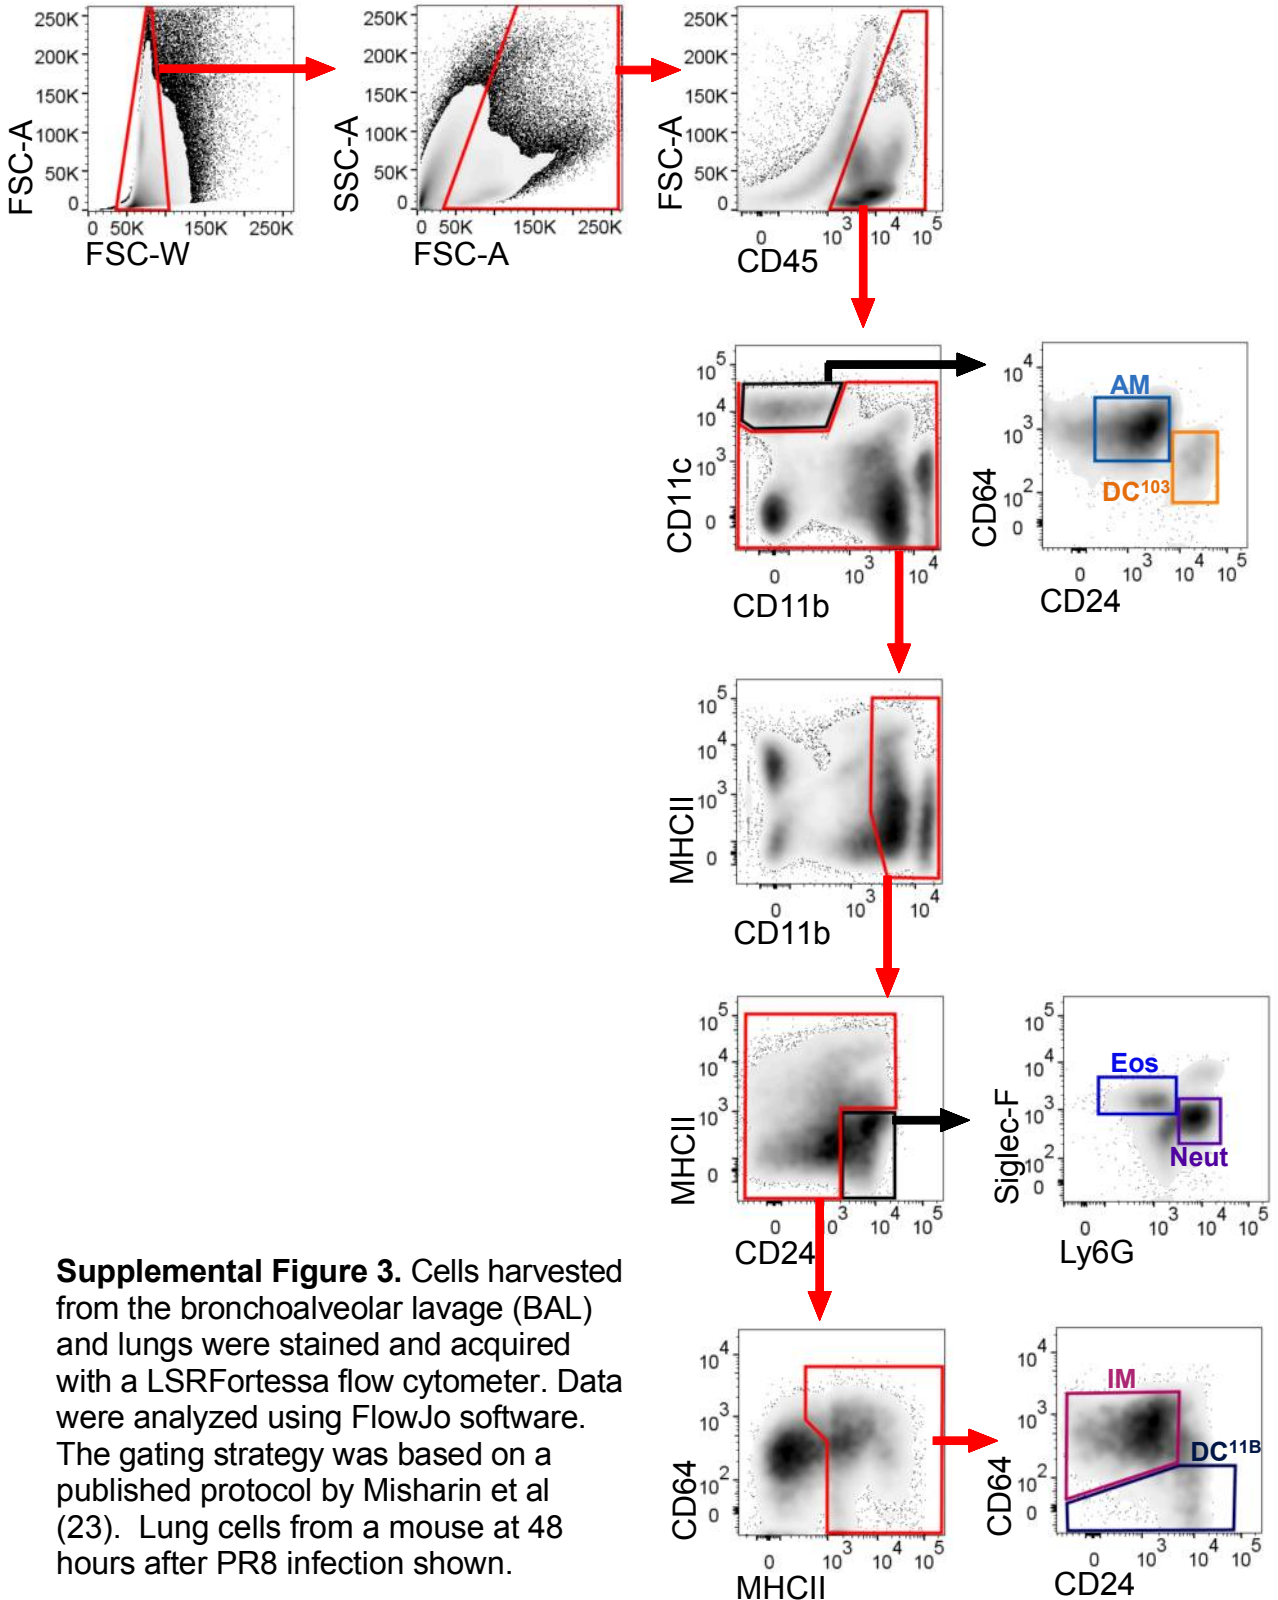

**Supplemental Figure 3.** Cells harvested from the bronchoalveolar lavage (BAL) and lungs were stained and acquired with a LSRFortessa flow cytometer. Data were analyzed using FlowJo software. The gating strategy was based on a published protocol by Misharin et al (23). Lung cells from a mouse at 48 hours after PR8 infection shown.
