# Supplementary material
Source: PubMed Central journal article supplement (PMC5903439)

# PR8: BAL Cell Analysis

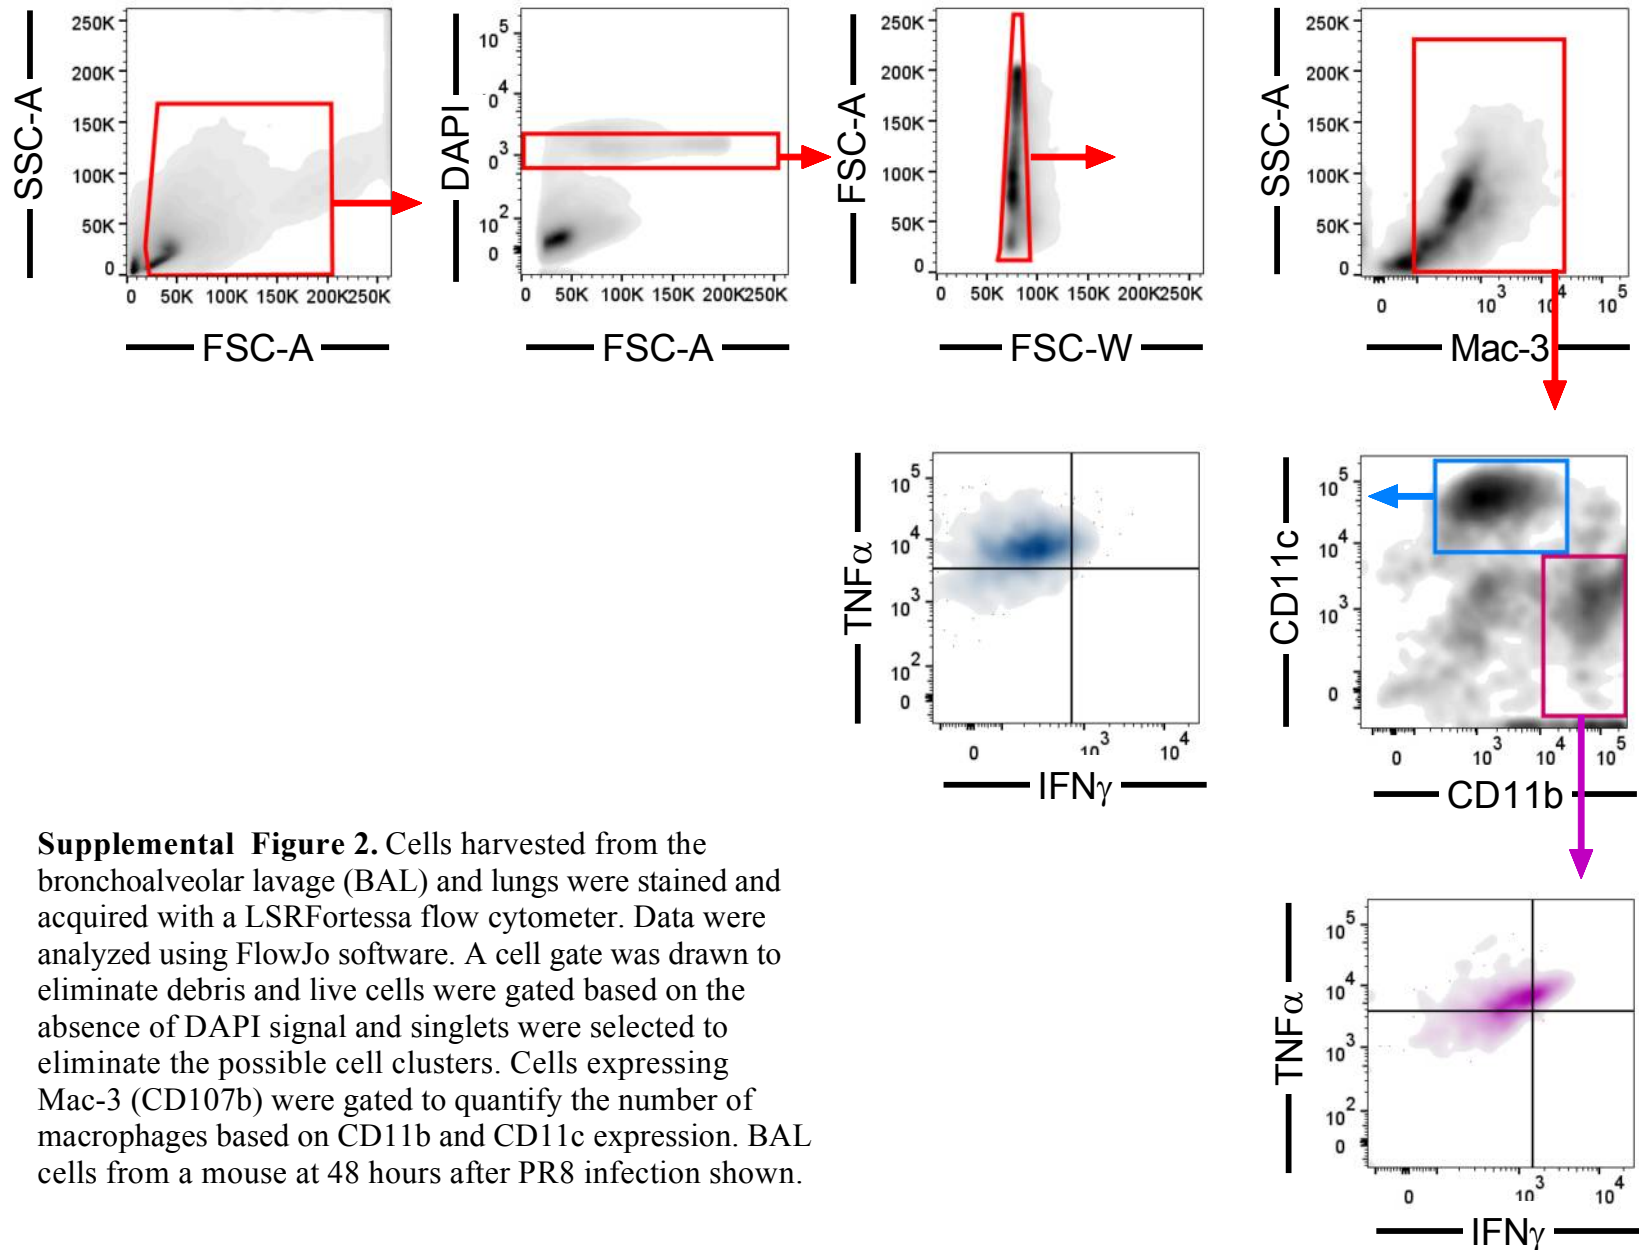

Supplement: NIHMS812676-supplement-3.pdf [file NIHMS812676-supplement-3.pdf]
